# Supplementary material for: Synthesis of cobalt ferrite nanoparticles by constant pH co-precipitation and their high catalytic activity in CO oxidation
Source: Royal Society of Chemistry journal article supplement (doi:10.1039/c7nj00558j), 2017-01-01
Supplement: c7nj00558j1.pdf [file c7nj00558j1.pdf]

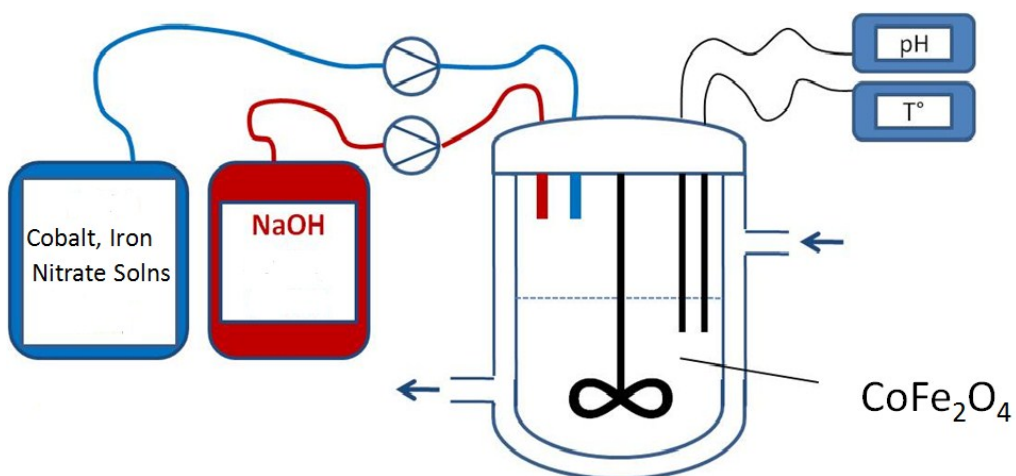

Figure S1: Schematic of the reactor

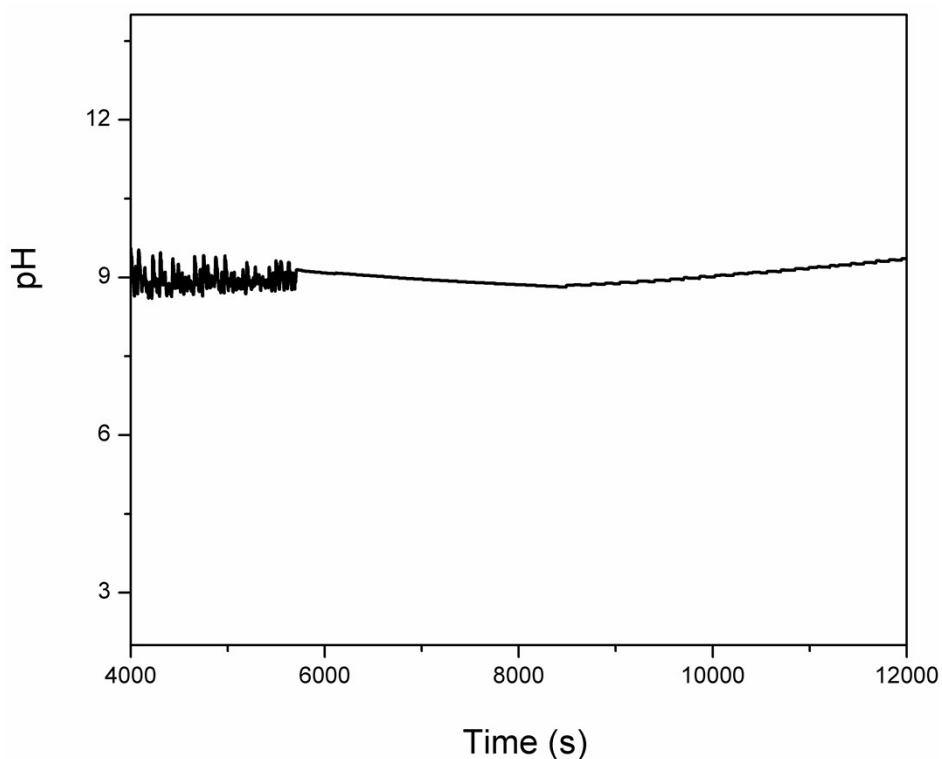

Figure S2: Patterns of the samples synthesized at 60 °C in different pH.

Supplementary Table 1:

| Element | At %  |       |       |       |
|---------|-------|-------|-------|-------|
| pH      | 9     | 10    | 11    | 12    |
| O K     | 55.74 | 56.44 | 58.76 | 60.93 |
| FeK     | 29.52 | 29.43 | 27.23 | 26.02 |
| CoK     | 14.74 | 14.13 | 14.01 | 13.05 |
